# Supplementary material for: Allometric shell growth in infaunal burrowing bivalves: examples of the archiheterodonts Claibornicardia paleopatagonica (Ihering, 1903) and Crassatella kokeni Ihering, 1899
Source: PeerJ. 2018 Jun 19;6:e5051. doi: 10.7717/peerj.5051 (PMC6014312; doi:10.7717/peerj.5051)
Supplement: Data S2 — Includes Area (in mm2), growth categories, identifier and Fourier coefficients. [file peerj-06-5051-s002.xlsx]

## Sheet: Sheet1
Outlines of Claibornicardia paleopatagonica (Ihering, 1903)
				Fourier coefficientes
Outline	Area (mm2)	Nº outline	Growth Category	d1	a2	b2	c2	d2	a3	b3	c3	d3	a4	b4	c4	d4	a5	b5	c5	d5	a6	b6	c6	d6	a7	b7	c7	d7	a8	b8	c8	d8	a9	b9	c9	d9	a10	b10	c10	d10
0	51.0304	10a_1	less than two	9.15219e+06	-39814.2	-180260	35989.6	-41391.3	144601	81099.2	-14527.2	179510	-145082	47892.4	175038	157690	-36289.4	-48355.3	-123481	54948	-46466.7	140096	-25210	-134154	-50630.5	-53931.8	41607.8	8882.85	16171.7	29413.9	-26340.5	-190.627	27693.1	4965.52	-4104.31	-51887.3	15019.3	24115.3	37267.5	-14356.7
1	347.793	10b_1	two to four	8.99114e+06	103693	-228721	175635	-114530	163154	-6399.61	-51188	216782	-13173.4	-71163	20150.2	171030	14298	-65438.7	-108910	39629	-31041	18250.1	57222.2	-87753.7	-39219	-86862	26146.1	35813.5	44761.7	-16086	-89257.2	-32998.4	-21764.4	-24982.5	-5583.03	-41128.3	14143.1	-51575.2	22222.7	43747.8
2	430.431	10c_1	two to four	8.97277e+06	225101	30392.9	-63085.5	-151633	187673	34443.5	-20955	114436	50379.5	-75263.3	10102	150751	58730.7	1865.61	-78964.6	1733.4	-2878.66	16696.7	56097.8	-17949.7	2480.67	-71185.8	13805.1	91567.2	42142	3518.99	-44583.3	-36444.1	-14936.1	-25136.6	32186.4	-31018.8	8436.06	-38679.7	6306.71	35896.9
3	119.804	11a_1	less than two	8.9197e+06	1869.64	-96740.7	83742.9	115112	198058	88391.1	77895.6	204378	-150271	-30829.9	-23744.6	74398.9	29487.5	-38715.1	-154826	28776.2	-23398.3	6763.66	32651.5	-107959	-25463	-69848.7	42790	5641.01	52772.1	-15021	-35209.2	-9069.27	-6301.92	17758.8	27502.3	-17095.8	12246.1	-22886.6	32207.5	18612.9
4	412.766	11b_1	two to four	8.9137e+06	155896	-185615	-98912.4	-128300	178036	107493	33487.1	150789	-3567.15	-64625.5	28321.6	114517	87762	-31653.5	-103901	-14141.2	-16015.7	-1696.87	3657.79	-55006.1	-30424.7	-74111.6	48791	62568	41060.8	-26836.9	-6086.95	14879.6	-27395.7	1119.24	2637.23	-60024.8	-8248.52	-40702.5	21623.2	13322.4
5	701.549	11c_1	two to four	8.67885e+06	428571	5112.1	-280502	-245466	259268	-67569.3	179628	216187	37422.3	-75262.4	-72065.4	151239	97310.2	-41484.1	-84773.3	32616.3	-22175.4	-11161.6	69952.1	-62838.4	11073.7	-80102	-4109.15	66802.9	39964.5	8393.84	-21015.6	-26227.5	-18280.2	-24488.2	29010.6	-29580.5	21089	-38383.5	6627.57	28735.5
6	42.2858	12a_1	less than two	8.4714e+06	113350	-195951	92963.5	58170	361628	181883	183809	159884	-81466.3	-82996.8	7213.8	195363	119235	34137.3	-193337	28542.1	-44181.4	14098.8	18092.7	-111543	-12696.6	-20863.7	63086.6	65601.1	26817.6	12763.7	-27831.7	9201.76	-33260.8	9636.2	12271.5	-28332.5	8565.15	11777.8	27553.1	11423.9
7	427.015	12b_1	two to four	8.56992e+06	247700	-226600	-92691.7	-97880.4	283430	109288	100187	125993	-32804.4	-53831.2	78517.2	169014	58085.5	-24217.9	-127828	112219	-65912.5	20691.7	-7299.54	-60502.4	-53857.5	-27100.1	103398	22265.4	-18084	-35946.5	-55895.7	28883	-35757.2	48621.9	-29775.2	-44318.1	-29906.6	-42740	56902.3	-2000
8	591.699	12c_1	two to four	8.9729e+06	227440	-104105	-101885	-169645	285397	107293	205120	98701.5	-16253.6	-49051.7	8003.48	145371	117443	39564.9	-136518	115809	-14687.1	71077.4	76672.4	-94237.8	-19217.5	-72644.6	13364.4	48868.3	46059.6	53189	-77678.7	7191.53	1802.13	6426.09	7598.04	-50667.2	2335.3	-54136.4	-14321	35199
9	249.712	13a_1	less than two	8.87447e+06	75876.9	-226703	-8873.02	-74120.7	275796	75571.6	71500.2	89061	-47786.9	-5733.71	123339	100585	8704.77	-54258.8	-84121.4	148567	380.34	18044.5	-62975.3	-69809.8	-94804.8	-33254.8	59286.4	13101.4	-12822.8	-24533.9	-10623.3	77317.9	-12661.9	-18055	-43922.2	-43279.7	-51328.3	9884.48	31598.7	-47379.3
10	373.624	13b_1	two to four	8.65918e+06	178672	-197822	55267.2	-229077	274510	66458.5	118700	179222	15526.5	3082.52	139767	189540	11865.8	15573.2	-98078.1	96835.8	-21861.5	48748	-28009	-65699.9	-55872.4	-35744.9	27756.7	25939.3	28679.4	-23703.4	-95080	25349.1	-6866.64	15732.3	-1196.04	-60701.5	-24568.2	-57721.9	43615.4	30243.6
11	528.862	13c_1	two to four	8.64703e+06	240939	-87085	-6960.02	-273211	283312	168068	133451	186911	45329.6	-65910	-9.08265	218837	41622.2	36876.6	-116339	12223.7	-41380.6	27352.1	70721.4	-48503.9	1945.45	-63576.2	-5053.48	63753	27042	51136	-30292.2	-39676.2	-24180.5	-17897.9	28821.6	-33637.3	33277.6	-7201.3	-14769.7	27397.7
12	713.654	13d_1	more than four	8471777	340042	43793.1	-16758.2	-312386	281691	154435	21498.9	188206	109431	-85955.1	-122665	223907	116497	32458.8	-113302	2642.46	-53827.1	-54753.3	73749.4	14213.6	54209.5	-66860.1	-49215.5	68603.4	-4469.96	39451.8	9176.48	-62021.2	-19560.6	-51404.5	23590.1	-2385.15	46083.4	28207	-30419.6	15274.6
13	842.842	13e_1	more than four	8.60685e+06	447662	68055.3	62501.7	-244291	189030	162423	70764.8	279554	114407	-60971.8	-101913	208570	54589.5	97565.5	-61543.8	-46214.3	-65117.8	-66236.1	50131.7	25903.3	85556.3	-86.365	-76763.4	26187.4	-25872	11772.2	19180	-62841.5	37190.7	-56632.6	23206.1	12759.8	31145.6	12976.6	-31702.1	-21807.4
14	315.824	14a_1	two to four	9.25496e+06	176447	-24789	-51778.1	-76319.9	188794	65914.3	103274	116977	-59733.8	11712	21265	165512	77012.9	-43435	-163635	10208.8	-7330.71	10457	11185.8	-141448	-19948.4	-82851.3	69408.9	29962	46810.8	10191.1	-34434.2	35430.5	-15171.9	-11559.4	-15432.2	-62218.2	-7613.67	-36866.7	-9037.39	7341.73
15	1646.06	16a_1	more than four	8.65023e+06	323484	-246996	209005	-466966	233887	-19051.8	-100782	263811	288392	-60590	-133029	114943	-20810.4	72694.7	42219.8	-17445.2	88445.7	-62129.5	17080.8	81435.5	15153.4	80965.8	-988.586	-52460.2	10592.7	-55413.5	12814.4	25114.9	48643.3	27868.5	-36997	21337.1	-4985.19	-3584.13	24320.8	-14321.9
16	101.305	1a_1	less than two	8.46918e+06	121195	-170849	-5278.72	-104274	312116	121407	108178	186268	-38428.1	-102337	1278.61	79761	82400.6	-20881.5	-146354	73926.9	-17674.1	2184.07	75214.4	-97777.8	-5325.93	-67550.2	44282.6	21357.8	33512.2	4674.22	-50559.2	22215.8	7192.6	-17493.4	-27480	-36362.3	-13409.9	-32446.5	19265.6	36633.7
17	400.952	1b_1	two to four	9.04413e+06	185538	-207447	-39730.7	-150975	108461	6987.91	47199.3	182313	-15158.7	-163611	-55444.9	64289.3	74725.1	-112280	-149739	-47041.9	-18406.5	-59564.1	96288.2	-69581.1	-1891.1	-111479	74808.1	42514	28146.9	-22187.1	-18362.4	-18351.9	-47218.3	-10632.5	15771	-12220.7	10882.1	-30090.4	40473.7	34046.3
18	567.512	1c_1	two to four	8.94971e+06	133372	-244501	-36392.5	-215985	165411	107353	130983	184814	-14023.7	-120172	23502.2	159334	45013.4	-22714.8	-137784	-15635.7	-21867.7	5927.48	50938.4	-96424.2	-23446.1	-97281.4	14629.5	45487.4	60588.3	29991.8	-29007.5	-13998.5	-12654.7	-21813.5	33634.7	-38719.2	16064.3	-14000.8	9502.5	53722.6
19	724.395	1d_1	more than four	8.38197e+06	162556	-248276	75128.4	-77147.6	281301	140957	88184.9	200043	-45576.5	-107156	126221	189803	107360	4864.67	-153431	12488.7	-77477.7	33671.5	34916.6	-79363.9	-7340.65	-86389.1	14767	84159.9	5606.72	-1524.51	-81628.3	-27283.8	-43055.5	-29365.7	6308.42	-29821	4035.76	-46262.9	13811.1	4554.62
20	967.525	1e_1	more than four	8.30953e+06	412156	-153817	70216.1	-335076	270067	90274.7	-30825.6	186103	133278	-141019	-16978	307106	97551.2	45907.2	-62014.6	-32133	-90345.5	-56397.3	77763	14918.3	67296.1	-35340.9	-53250.2	66479.4	-31905.6	12822.5	8547.19	-48491.7	-9176.26	-43116.8	20856.5	12761.3	13084.1	-9829.58	-18007.3	-6046.44
21	1012	1f_1	more than four	8.40976e+06	522193	-142635	61598.5	-380160	166617	111919	81971.6	185450	153946	-85773.8	46883.3	246974	94108.6	83859.8	-24391.4	-42803.4	-46888.8	-14792.3	77837.9	-9370.08	76942	-11747	-26737.2	68622.3	-3682.85	61411.1	4639.8	-50990.3	18618.2	-24637.8	-12906.6	-2072.16	35750.9	21200.8	-36018.5	11049.8
22	1071.44	1g_1	more than four	8.50503e+06	465405	3110.92	50232.3	-322840	219901	83005.7	67097	222264	189789	-95484.7	-61963.9	196423	33758.5	75937.9	-42659.8	-42275.3	-68465.1	-57620.5	88295.3	46302.8	75966.2	6282.66	-36138.8	18468.3	-41496.8	25075	14011.1	-50426.5	12174.8	-41976.8	2246.15	17591.3	-2386.52	23104.6	-14325.2	-10033.1
23	54.3976	2a_1	less than two	9.02052e+06	-38135.9	-129985	-73396.2	-17301.8	132225	58567.4	36151.4	257111	-102834	-1853.27	95150.8	81418.8	-78862	-95710.9	-153179	86808.2	-32164.1	50035.1	-4032.73	-73739.4	-106895	-29690.8	128563	10382	32568.8	14821.3	-28702.8	-10356.3	-9744.08	36699.6	-33231.7	-75724.7	4659.78	20756.1	34530.7	15331.1
24	321.983	2b_1	two to four	8.75938e+06	145198	-181529	46508.7	-117688	247570	55975.4	-8229.23	206869	-14248	-60283.3	34595.3	54507.3	50167.7	-53732.7	-66078.1	45370.8	24678.5	-21304.7	-23946.8	-57630.4	-44063.4	-22367	60201.9	34701.2	17191.8	-36725.8	-4509.82	69173.5	-15066.7	7971.65	-29533.3	-25262.7	-31282.5	8857.59	58930.7	-16821.6
25	458.469	2c_1	two to four	8.63481e+06	168078	-115274	64975	-97718.2	233905	41927.9	-45062.8	216401	11554.6	-60253.6	72422.8	96616.8	113627	-63228	-96379.2	-45595.5	-40777.3	50857.9	64907.1	-28480.9	25031.1	-76534.8	33118.6	77947.9	15313.2	16440.6	-53775.8	-46160.1	-12100.8	-998.475	28806.9	-35561.9	11206.7	-55702.3	-10821.9	25110.3
26	622.492	2d_1	more than four	8.73067e+06	187699	-206721	80747	-227723	209536	41102.1	75314.7	175145	-4286.92	-62419.1	80312.2	150513	78707.7	-20781	-79321.3	20154.4	-50680.7	21910.7	43425.7	-68459.2	-32232.5	-80749.7	-338.959	73944.8	38346.9	6925.73	-71013.7	-29970.6	-46297.6	-10904.4	40140.4	-35149.7	11205.9	-58380.2	-1280.94	30194.9
27	745.328	2e_1	more than four	8.77803e+06	394423	-15991.8	-138018	-240663	229607	16948.4	112577	248016	104539	-119854	16730	190138	89008.8	14757.9	-74016.7	-7689.69	-28120.4	-25156.3	48543.4	-31695.1	2484.88	-64169.5	-26914.1	90185.7	47034.4	36012.9	7915.41	-61205.6	-22056.3	-38728.1	45583.8	-22006.6	53292.7	-12224.1	-25042.9	23310.2
28	802.068	2f_1	more than four	8.63149e+06	412174	-43447.8	-139464	-218744	236688	42354.6	114878	268386	103425	-113178	29319.8	163883	93556.3	44188.1	-81869.5	-23238.4	-36625.9	-35807.6	53157.1	-3828.22	44821	-61296.3	-42491	69007.6	31901.4	24902.7	-15157.6	-44101.5	-24188.7	-37079.6	45609.6	13994.7	53626.7	-7287.36	-18825.8	11960.4
29	866.729	2g_1	more than four	8.60117e+06	383898	96363.4	-107982	-288145	155476	44638.9	59120.9	264050	202590	-63106.5	-51909.9	191578	46355.2	60105.1	-39911.6	-41481.3	-29629.9	-51525.2	67478.8	30471.1	61943.2	-7816.72	-48075.6	9135.28	-21457	40037.7	21457.2	-40004.6	22148.7	-44958.4	4024.18	38523.4	19988.4	34384	-8004.76	-6497.53
30	167.292	3a_1	less than two	8.89635e+06	347727	-185540	-174727	-139340	181381	136133	-24025.8	132238	23685.4	-196229	-75.0382	259087	86222.9	31023.2	-53540.3	-41524.6	-70073	-36130.9	44883.3	-92647.5	74484.6	-63847.8	-19934.3	47891.7	45818.3	1940.01	-16604.5	11320.6	-7979.32	-24649.8	55644.6	9146.09	33842.2	-47913.8	-9694	15886.9
31	591.276	3b_1	two to four	8.82935e+06	243130	-127964	-10018.2	-144475	208078	74894.5	-5315.1	226163	42438.7	-168337	-35342.4	156985	77533.7	-19404.1	-92330.7	-64425	-53771.5	-13233.5	74188.4	-43985.8	64963.4	-74109.2	-727.441	60444.6	14028.2	32592.5	-15627.8	-60714.6	-6560.01	-28601.5	34795.9	700.545	48389.5	-9675.57	3069.5	9373.12
32	742.187	3c_1	two to four	8.81275e+06	309696	-55820.7	-43369	-242591	202958	171629	-15324.7	177690	143833	-133397	-56402.7	126016	81265.7	12144.4	-104188	-34945.8	-25486.7	-41135.1	89384.9	6842.64	78273.9	-80644.5	-13971.3	56866.3	13803.8	34067.1	-18170.8	-34017.7	-5171.74	-31421.2	56839.8	12402.2	50801.7	17189.3	20084	13034.9
33	819.35	3d_1	more than four	8696297	351019	-148171	16993.1	-286334	168974	33349.4	151346	214813	155360	-114261	-7210.65	188878	84770.2	19525.2	-71557.1	2430	-29186	6627.2	72082.8	50398.3	45460.2	-67148.3	-33254.3	56580.6	-14667.7	58617.6	-34636	-55889.9	-6293.36	-50291	15807	-16238.4	19928.9	1428.03	-16826.3	18591.1
34	925.852	3e_1	more than four	8714104	357061	98414.8	92182.2	-381536	187625	18298	-9098.3	269219	195241	-34095.5	-101498	139896	28248.2	74338.4	-1290.92	-39976.1	-28.7598	-63779.8	23454.7	70004.3	66089.7	27430.4	-43188.2	-26213.5	-50242.1	5273.96	39406.8	-14330.9	36839.7	-8805.81	11495.4	36356.4	-15946.8	31291.5	-7527.1	-5591.42
35	58.7482	4a_1	less than two	8.69312e+06	53459.2	-276195	-77488.2	54746.7	327769	145801	121692	45235.2	-67190.7	-14589.4	154534	79679.7	111464	-29321.6	-156878	91131.9	24012.2	53767.9	-76430.6	-73287.3	-14580.1	17148.7	82133	-2096.99	56154.4	-33307.5	-14052	18024.5	11560	36434.6	-28529.9	-22292	-4440.24	-639.33	21757.3	-8441.34
36	119.826	4b_1	less than two	8.64052e+06	243333	-123977	-43680.2	48788.9	231470	101871	112127	151948	-5514.74	-31284.8	71682.5	168640	-15029.1	-31112.5	-106727	71927.7	-3964.74	36638.3	-59952	-53142.7	-73491.6	-14381.1	49791.1	-4827.55	-14947.4	-8931.06	14819.1	70902.6	-11805.6	16828.4	1251.24	-52843.6	-36820.7	40133.1	47484.8	-43551.3
37	226.592	4c_1	two to four	8.84457e+06	165674	-195118	1260.18	-46601.7	187676	180904	133147	84221.3	-98745.1	-119195	25737.7	263533	80619.1	-8780.41	-166841	30310.2	-103577	-46915.8	-6689.07	-94729.2	3719.69	-108617	9715.76	4399.21	24500.3	-42119.4	-27122.8	8376.74	-1907.04	-35482.5	29257.9	-23209.8	3326.46	-33099.2	55985.2	59.0938
38	444.211	4d_1	two to four	8.86425e+06	241543	-164275	26594.1	-93862.5	208734	164195	100427	205751	-13795	-149075	-30673	176398	88155.7	54412.4	-156615	-45787.5	-43079.3	-45620.9	90089.4	-92521	43084.8	-56745.5	15850.6	71171.7	34256.9	34738.1	-35348.8	-21581.4	-51309.5	2746.75	58987.5	21495.6	35163.6	-15321.6	147.161	27698.2
39	630.81	4e_1	more than four	8.85419e+06	346377	-96918.3	123192	-137594	85638	133128	67205.6	233856	114757	-124592	-84873.5	194607	46452.5	97093.2	-72837.1	-88346.2	-71086	-56851.1	97898.2	35168.2	64381.7	-4853.08	-39175.2	36415.5	-36396.8	41837.9	17904.2	-83346.9	14728.3	-31109.7	1564.21	-54.961	47506.7	33016.3	-20021.4	-2646.77
40	697.531	4f_1	more than four	8.87714e+06	394670	56368.4	35810.4	-171623	79770.4	112983	75486.6	248564	175749	-99061.8	-132735	132608	18250.1	104065	-50667.4	-104794	-10552.4	-91183	89606.1	78048.6	53403.1	23311.8	-30286.4	-119.525	-33287	40486.5	54980.9	-58178.3	26706.8	454.583	23566	14926.4	22513.7	63647.1	-13869.9	3223.63
41	786.415	4g_1	more than four	8.86249e+06	387328	44097.5	84358.4	-267531	34608.2	57778	25075.6	290365	256070	-84771.4	-130846	88046.3	-78348.5	71103.6	19293.5	-92644.3	38852.1	-71304.3	60448.4	72719	49059.3	58186.4	-22875.9	-11379.2	-23243.7	3668.14	39509.1	-10019.5	9924.83	-8397.62	-14659.5	35103.4	-36838.7	52194	2613.65	19234.9
42	847.979	4h_1	more than four	8.87974e+06	473239	161065	27010.9	-247090	69962.9	99684.7	161309	324497	239066	-18779.3	-88596.4	100092	-15467.2	142848	-1686.99	-106487	32793.3	-49331.9	27791.2	52505	64110.6	36393.1	-53931.2	5599.42	-17382.2	14155.8	25057.5	-36983.6	29582.3	-19530.1	2115.74	43643.8	12441.7	42437.9	5143.67	1626.36
43	193.379	5a_1	less than two	8.94365e+06	93262.8	-108879	-6810.21	23808.3	290685	57013	24819.4	206518	-92879.8	-36360	27235.8	114547	13159.3	-115641	-111156	98544.5	11665.4	8285.7	-12124.9	-130838	-71982.8	-59535.5	96490.6	-8410.04	29412.2	-24838.9	-35381.6	59739.6	-4481.4	27280.8	-15660	-20167.3	-19386.5	-6362.42	50046.5	-12543.9
44	241.122	6a_1	less than two	8.98833e+06	105875	-194808	103153	-10552.8	170271	-34989.8	10857.2	194681	-93544	-27630.3	47071.1	142258	13068	-98525.4	-80576.4	58147.1	-5907.14	-24335.3	-55722.8	-124045	-32338	-60010.8	102297	-57679.2	56442.7	-37935.2	-16586	45536.5	11699.3	3179.92	-30412.4	-25703.2	-1313.29	6155.81	80115.2	289.695
45	493.308	6b_1	two to four	8.64107e+06	330339	-162230	32532.5	-158208	279510	78333.5	65480	68385	70175.4	-71433.4	33619.4	178965	149167	-34427.2	-162662	9729.82	-1465.9	19554.7	84320.5	-59326.9	27220.8	-68538.2	35981.9	79135.8	49932.9	30277	-20168.2	-36015	-35320.6	-742.694	10208.9	-8938.67	34770.2	-1962.45	11015.1	28493.7
46	691.956	6c_1	more than four	8.75003e+06	329035	-99300.4	58779	-135171	257648	126366	-5259.54	117609	39139.5	-130275	-25423.8	187002	117787	-5059.78	-142022	4512.22	-59398.5	-16064.3	146480	-40393.4	58620.7	-78915.3	-1810.93	37260	41815.8	57272.8	-9615.94	-71188.2	7821.38	-27742.1	52342.1	18487.4	30590.8	20324.3	4595.07	38307.3
47	75.0096	7a_1	less than two	8.65488e+06	33702.7	-218664	-228672	-110706	289584	110074	77166.7	169783	-77317.4	-77177.5	92564.5	140519	43214.8	-47188.4	-134798	55839.2	-28448.5	-23560	-8347.93	-119475	-52444.2	-31470	70296.3	10542.4	14099.5	-41851.4	-12585.6	29753.5	11270.8	24317.7	-14699.2	-64336.5	-40767.9	-37568.4	6866.09	16699.9
48	326.999	7b_1	two to four	8.57928e+06	92313.5	-169954	-12316.7	-120485	262936	33939.3	-4714.37	223934	-34523.7	-77358.2	90276.6	132905	11019.1	-90188	-117729	119224	-31611.1	28972.4	-10461.1	-104204	-39081.7	-69793.7	63543.6	-13728.1	23399.3	-24306.2	-56723.9	33684.2	14811.9	2427.44	14561.7	-43578.1	-32768.3	-29912	38688.5	9243.62
49	456.658	7c_1	two to four	8.65565e+06	183616	-66547.1	-20739.7	-201695	339687	27647.5	-27879.3	184265	-5970.96	-63811.1	22818.1	175507	61395.7	-90461.4	-125849	58196.9	-23941.9	23986.8	6900.48	-109313	-618.474	-115003	62999.5	26942.9	35332.7	-9000.62	-30714.5	18735.9	-3913.66	-5262.6	37052.4	-47342.4	9067.36	-30841.9	20639.5	3151.01
50	528.061	7d_1	more than four	8.8247e+06	253173	-249605	43407.9	-267776	243036	110999	56795	127084	83495	-147257	-3494.59	176592	101349	8510.39	-159515	42979.1	-32847.3	-37784.4	70476.2	-83100.5	31314.8	-94997	24816.6	36578.8	37790.4	22273.9	-11934.7	-20685.3	-23629.8	-19056.2	47459.4	-19095.4	39492.3	-34383.9	-1213.1	14503.5
51	632.896	7e_1	more than four	8.52893e+06	241848	-197125	29957.8	-254150	269089	75354.3	23459.9	198966	44084.4	-118573	967.083	218267	80286.8	20357.3	-122162	-2415.32	-68940	-5305.46	109333	-42970.2	54446	-46994.5	12843.6	51397.8	15988.8	32918.4	-50461.5	-51258.8	-16968.8	-21793.9	30988.8	11723.2	51835.4	-17098	-3581.85	9303.22
52	732.355	7f_1	more than four	8868703	411621	32318.4	8660.56	-338385	229070	90982.1	103860	228160	117073	-84230.3	-70256.5	219549	65910.7	122878	-68348.6	-41362.2	-46212.5	-45008.6	72919.1	-2492.65	56112.6	4614.75	-40995	38179.5	-16564.3	20836.9	-11036.3	-21368	8140.88	-38551.6	1828.34	13968	22147.9	17770.9	3875.82	-1872.71
53	157.177	8a_1	less than two	9.2028e+06	118550	-78773.3	91193.7	116708	123346	62001.4	1940.67	125298	-97661.9	84342.2	36874.4	85705.8	28173.9	-61225	-54116.5	11877.9	14726.5	45550.8	-51846.1	-125126	4494.6	20060.8	78241.2	-11797.3	23574.1	-21592.3	-2441.5	49317.1	60392.1	-7692.78	-61665.2	-35930.9	-23555.2	29140.2	29385.9	-4779.14
54	352.111	8b_1	two to four	8.88204e+06	251783	-155561	-85477.9	-99919.2	128721	113770	125953	256636	1098.82	-46390.5	136820	152418	-81486.8	-4979.37	-72030.2	76389.6	-1213.95	22733.4	-61636.1	-67148.5	-73950.2	-17538.8	55370.8	-44883.7	12600	-30739.2	-29698.5	58633.3	11139.6	-24215.9	-60082.7	-42118.3	-23931.1	6186.99	54696.1	-7134.76
55	450.933	8c_1	two to four	8.76576e+06	89665.3	-176140	18162.3	-80475.7	218860	94516.5	86732.5	215587	-51823.8	28288.2	138947	126717	-36224	-13584.1	-43970.1	127912	-20669.5	44373.8	-77504.1	-66529	-91693.5	15285.5	59140.4	-35756.4	-16735.7	-34287.5	-23200.4	58255.1	21454	-1070.65	-59192.6	-48594.1	-33409.2	-3961.23	24048.5	-39569
56	698.64	8d_1	more than four	8.28451e+06	329586	-74271.9	129260	-247032	235797	81098.3	-4881.78	283887	109325	-136296	-85550.5	166044	34085.3	74991	-36754.5	-44043.9	-51623.2	-101267	55267.2	44800.3	78945.5	19371.2	-65247	7718.07	-37702.3	-4083.38	31926.9	-48978.2	37739.5	-37229.3	12717.2	21938.9	17146.7	4773.03	-14845.2	-28234.2
57	734.852	8e_1	more than four	8.37493e+06	332193	123095	-6236.69	-271226	262169	41504.3	23185.5	306467	112481	-65343.9	-98024.8	125015	77919.5	93707.1	-27481.6	-38545.6	-18909.2	-75894.2	45583.4	55284.3	81091.2	13961.6	-63942.7	6283.71	-37367.8	12582.1	28417.2	-30215	31108.3	-31740.2	4829.3	38664.4	11130.5	20198.9	-15585.1	-10744.4
58	31.245	9a_1	less than two	9.3552e+06	-54479.2	-268568	-62879.7	28131.6	250788	101652	53804	-2847.57	-66049	20819.6	168423	-9883.26	5463.53	-65296	-109732	163205	-9322.69	61542	-63966.4	-6253.59	-51344.9	37791	127130	-67941.2	-21346.1	-13028.3	20504.2	16118.5	31112.7	25627.7	-63466.5	-11014.2	-17500.8	27204.8	4058.73	-30970.1
59	137.432	9b_1	less than two	9.19165e+06	154179	-225600	-17735.3	-107432	127960	167224	52061.5	152167	-57208.6	-85651.2	16256.3	74491.8	37885.4	-4956.15	-135624	9423.84	-30518.2	31899.4	38737.9	-51275.1	-40395.5	-83154.2	33020.7	32613	49473.1	5038.83	-13019.3	6727.73	-20675.2	23801.4	24622.1	-44756.8	-17066.6	-19440.4	26383	46859.3
60	381.596	9c_1	two to four	8910879	133975	-111287	132224	-100147	155386	55585.9	-17502.4	152030	-8038.76	-63782.4	6691.52	53517.8	97407.6	-92376.4	-144390	-19895.7	-22952.1	37164.3	50104.8	-73254.9	20100.6	-138529	40875.7	39283.1	57378.4	36879.9	-27780	-31615.2	-8296.07	-18963.6	49521.8	-29897.7	9060.05	-21953.1	1797.37	48105.6
61	524.596	9d_1	two to four	8.73423e+06	256672	-89483.5	-29731	-179222	267955	115626	14304.6	195697	-31308.7	-53312.4	66214.9	144028	115827	-11964.7	-94906	20054.7	-76074.8	58380.2	51570.3	-36901.4	-1149.32	-70339	10086.4	51466.6	31857.5	4116.43	-71197.4	-35967.1	-38985.4	-11558.9	15047.4	-9316.35	20818.7	-52840.9	26456.6	22886.6
